# Supplementary material for: Oxyhalides: prospecting ore for optical functional materials with large laser damage thresholds
Source: Royal Society of Chemistry journal article supplement (doi:10.1039/c7tc04857b), 2018-01-01

**Electronic supplementary information**

**Oxyhalides: Prospecting Ore for Optical Functional Materials  
with Large Laser Damage Thresholds**

Zhihua Yang,<sup>\* a</sup> Cong Hu,<sup>a</sup> Miriding Mutailipu,<sup>a</sup> Yanzhou Sun,<sup>a</sup> Kui Wu,<sup>a</sup> Min Zhang,<sup>a</sup> Shilie Pan<sup>\* a</sup>

*<sup>a</sup>Key Laboratory of Functional Materials and Devices for Special Environments of CAS, Xinjiang  
Technical Institute of physics & Chemistry of CAS, Xinjiang Key Laboratory of Electronic Information  
Materials and Devices, 40-1 South Beijing Road, Urumqi 830011, China. \*E-mail:  
zhyang@ms.xjb.ac.cn, slpan@ms.xjb.ac.cn; Tel: (86)-991-3810816; Fax: (86)-991-3838957*

**Figure S1** Density of states (DOS) and the specific orbitals in the energy range near the band gaps for  $\text{Sr}_4\text{OCl}_6$  (a),  $\text{Ba}_4\text{OCl}_6$  (b),  $\text{Ba}_2\text{OBr}_2$  (c),  $\text{BiOCl}$  (d),  $\text{Bi}_3\text{O}_4\text{Br}$  (e),  $\text{Bi}_4\text{O}_5\text{Br}_2$  (f),  $\text{Bi}_5\text{O}_7\text{Br}$  (g),  $\text{Bi}_7\text{O}_5\text{F}_{11}$  (h) and  $\text{Bi}_{24}\text{O}_{31}\text{Cl}_{10}$  (i).

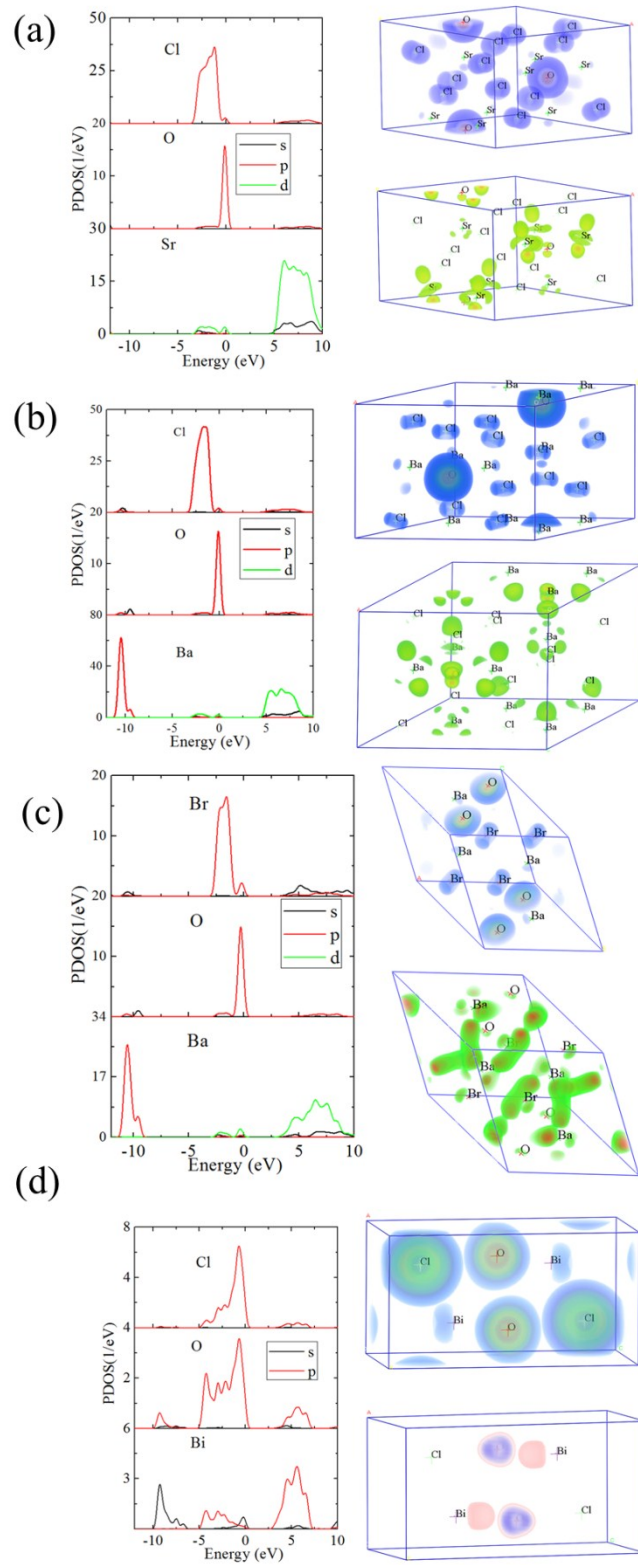

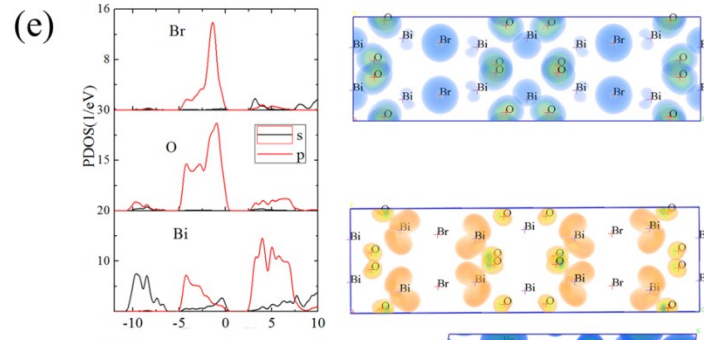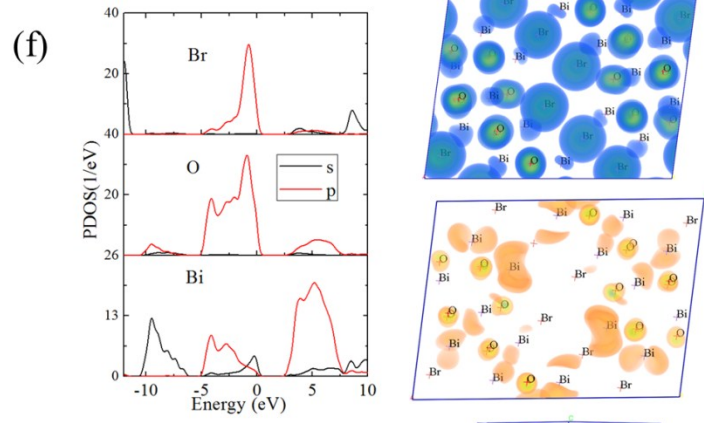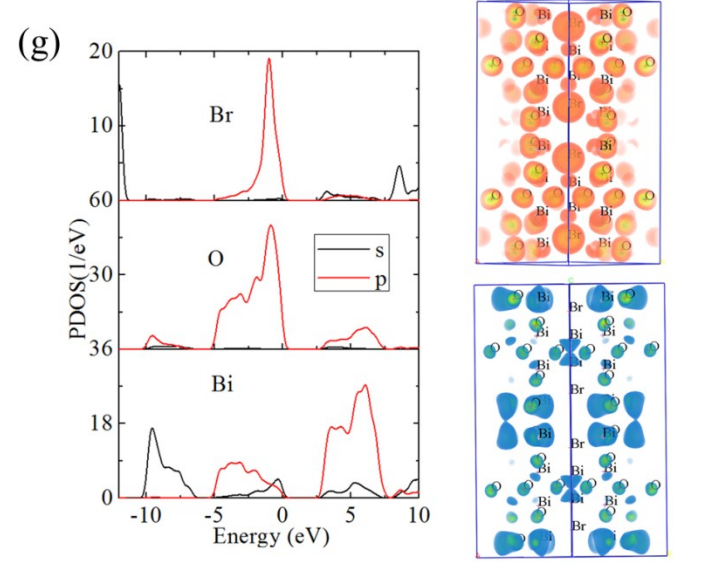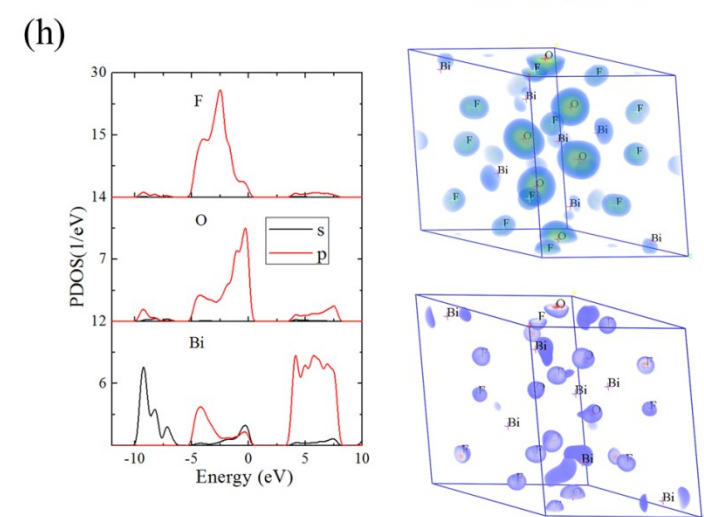

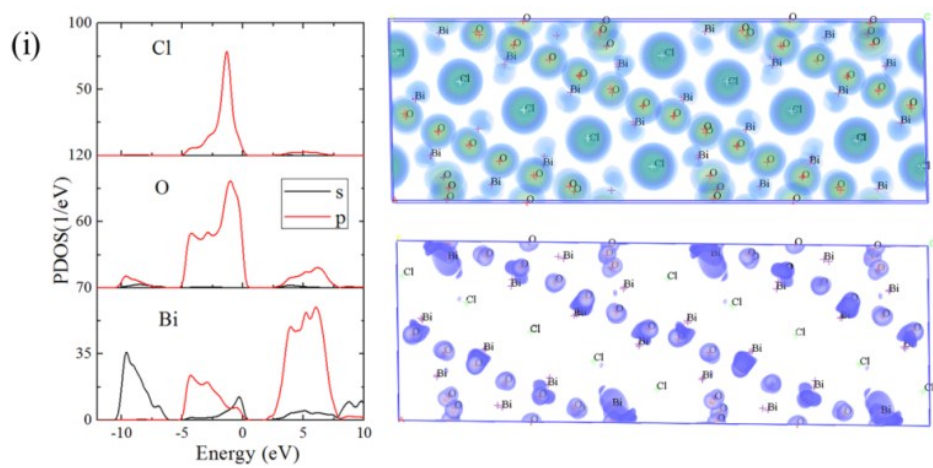

Supplement: c7tc04857b1.pdf [file c7tc04857b1.pdf]
